# Supplementary material for: Building the 8-Star Doctor: A Modified Delphi Study to Define, Teach, and Assess Health Professions Education for Undergraduate Medical Students
Source: Research Square preprint supplement (doi:10.21203/rs.3.rs-6209064/v1), 2025-05-27
Supplement: Supplementary file 1 [file f8d6eadd1e9b9e06fcbb255e.docx]

**Additional File 1**

**Appendix A**

**Modification, Addition, and Removal of Content by Nominal Group Technique**

| # | Identified through literature | Modified by Nominal Group Technique |
| --- | --- | --- |
| 1. | 7 themes   - - 1. Learning Environment     2. Educational Psychology     3. Teaching and Learning     4. Curriculum     5. Instructional Design & Performance     6. Assessment and Evaluation     7. Leadership & Professionalism | Changed into 5 themes   - - 1. Educational Psychology     2. Teaching and Learning     3. Curriculum     4. Assessment and Evaluation     5. Leadership & Professionalism   *The learning environment was removed as a theme and added as a topic in teaching and learning.*  *Instructional design and performance merged with Teaching and learning ( topics relocated to the teaching and learning domain)* |
| **Learning Content of HPE** | | |
|  | - - - - 1. **Rephrased content by Nominal Group Experts** | |
|  | Identified through literature | Modified / Rephrased by Nominal Group Experts |
| 1 | Metacognitive strategy | Metacognitive Strategy, critical thinking, and problem-solving. |
| 2 | Motivation in learning | Motivation in Learning **(Maslow’s Hierarchy)** |
| 3 | Identify and incorporate experiential learning theory | Identify and incorporate experiential, learning theory **(Kolb’s Learning style)** |
| 4 | Formation and alignment of SMART objective of knowledge, skill, and Attitude | Introduction of Smart objectives of Knowledge, skill, and attitude |
| 5 | Curriculum evaluation  Program evaluation | Student’s role in program evaluation |
| 6 | Construction of written assessment | Assessment of knowledge |
| 7 | Construction of performance assessment | Assessment of attitude |
| 8 | Designing and conducting OSCE/OSPE | Assessment of skill |
| 9 | Programmatic assessment | Merged with summative and formative assessment |
| 10 | Medical education research | Merged as academic research, standards, and scholarship |
| - 1. **Deleted content by Nominal Group Experts** | | |
|  | Content Removed By NGT | Reason For Removal |
| 1 | Understanding Basic Principles of different educational theories | the very vast topic can be merged with adult learning theory |
| 2 | Long-term, intermediate, and Short-term theory | Part of Wiener’s attribution theory |
| 3 | incorporate questions at various cognitive levels to stimulate thinking in teaching | entirely teacher-centered domain |
| 4 | Designing instructional material | superfluous |
|  | Designing instructional material | unnecessarily overburdening the student |
| 5 | Steps for planning examination and Table of Specification | merged within the feedback. Part of the assessment of attitude and reflection |
| 6 | Portfolio | Assessment is entirely the teacher's domain |
| 7 | Principles of assessment | Explained in types of curricula |
| 8 | Team building | Too many details not required by the students |
| 9 | Spiral curriculum | as curriculum integrated |
| 10 | Steps for curriculum development | Professionalism has 6 pillars merged with conflict of interest. |
| 11 | Interprofessional teaching  Conflict of interest | Merge conflict management as professionalism |
| - 1. **Content added by Nominal Group Expert’s** | | |
| 1 |  | Wiener’s attribution theory |
| 2 |  | Self-directed learning |

**Appendix B**

Copy of DELPHI ROUND-1

DEVELOPING THE LEARNING CONTENT OF HEALTH PROFESSION EDUCATION FOR UNDERGRADUATE MEDICAL STUDENTS IN AN INTEGRATED MBBS CURRICULUM


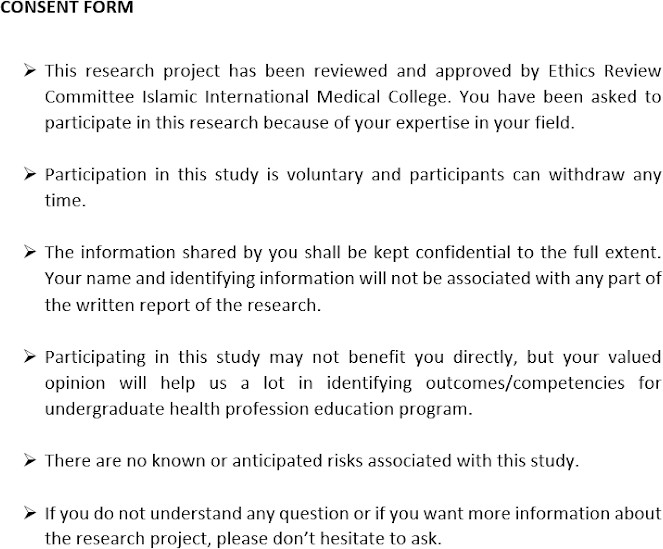
 * Indicates required question

1. I have read the information sheet and understand the aim of the research. The purpose of my participation in this study has been explained to me and is clear


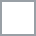
 Yes
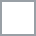
 No

Section I: DEMOGRAPHICS

1. 1. Name (Optional)
2. 2. Age (Optional)
3. 3. Gender *

Male

Female

1. 4. E mail Address (correspondence for Delphi Round II) *
2. 5. Basic Qualiﬁcation *

- Diploma
- MCPS-HPE MHPE
- PHD Health Profession Education

1. Designation *
   - - Lecturer
     - Senior Registrar
     - Assistant Professor
     - Associate Professor
     - Professor
     - Other:
2. 7. Years of teaching experience *

- less than 5 years
- 5- 10 years
- more than 10 years
- Other:

**Section II: HEALTH PROFESSION EDUCATION AS A SUBJECT AT UNDERGRADUATE LEVEL**

1. 1. Institution *
2. 2. Please specify Level of integration at your institution? *
3. 3. How Health Profession Education as a subject is being taught at your institute at undergraduate level?

- Formally Informally
- Planning to start soon
- Not being taught

1. 4. Should Health Profession education be taught as a subject to MBBS student? *

Yes

No

1. 5. Health Profession Education as a subject should be incorporated into undergraduate curriculum as a;

- Core Component of Curriculum
- Student Selected Component
- Part of Hidden/Informal Curriculum

1. 6. What teaching methodology (ies) should be used for Health Profession Education in undergraduate curriculum?

- Taught longitudinally by integrating it into different modules
- Single module at start of MBBS Program
- Elective Module

1. 7. What strategy/ies should be used for teaching Health Profession education * (you can select more than one option)

*Check all that apply.*

- Large Group Interactive Lectures
- Small Group Discussions
- Teaching Others / Peer Assisted Learning
- Role Play
- Other:

1. 8. How Health Profession education content should be assessed at undergraduate level?
   - - Formative assessment
     - Summative assessment
     - Formative and Summative both
     - No need for assessment

**Section III: LEARNING CONTENT OF HEALTH PROFESSION EDUCATION**

Based on Literature review and Focal group discussion we have generated the following content area and now as an expert please identify content/topics of health profession education that should be included in undergraduate MBBS curriculum

Please mark it on Likert scale of 1 to 3 (1 = Not Important, 2. Moderately Important, 3 = Very Important//Essential)

# 1. **EDUCATIONAL PSYCHOLOGY** *

|  | Not Important | Moderately Important | Essential  /Very Important |
| --- | --- | --- | --- |
| **Principles of Adult learning** |  |  |  |
| **Motivation in learning** |  |  |  |
| **/Maslow’s Hierarchy** |  |  |  |
| **Identify & incorporate experiential learning theory (Kolb’s)** |  |  |  |
| **Weiner’s Attribution theory** |  |  |  |
| **Self-directed learning theory & planning** |  |  |  |
| **Metacognitive strategies, critical thinking and problem solving** |  |  |  |
| **Learning styles (VARK, superﬁcial and deep learners)** |  |  |  |
| Any other topics of Educational Psychology you would like to recommend? |  | | |

# 2. **TEACHING AND LEARNING:** *

|  | Not Important | Moderately Important | Essential  /Very Important |
| --- | --- | --- | --- |
| **Student centered vs teacher centered teaching skills** |  |  |  |
| **Large group interactive sessions vs small group sessions** |  |  |  |
| **Evidence based teaching** |  |  |  |
| **Peer assisted learning** |  |  |  |
| **Online learning** |  |  |  |
| **Collaborative learning** |  |  |  |
| **Learning Environment** |  |  |  |
| **Working with diﬃcult learners** |  |  |  |
| **Skills for delivering effective presentations** |  |  |  |
| Any other topics of Teaching and Learning you would like to recommend? |  | | |

1. **Small group learning and facilitation skills** *

|  | Not Important | Moderately Important | Essential  /Very Important |
| --- | --- | --- | --- |
| **PBL** |  |  |  |
| **TBL** |  |  |  |
| **Tutorial** |  |  |  |
| **Bedside teaching** |  |  |  |
| **Procedural skill teaching** |  |  |  |
| **Simulation teaching** |  |  |  |
| **Community based teaching** |  |  |  |
| Any other topics of small group learning you would like to recommend? |  | | |

# 3. **CURRICULUM** *

|  | Not Important | Moderately Important | Essential  /Very Important |
| --- | --- | --- | --- |
| **Basics of curriculum and its various types including Outcome/competency-based approach** |  |  |  |
| **Hidden curriculum** |  |  |  |
| **Introduction to SMART objectives of knowledge, skill and attitude** |  |  |  |
| Any other topics of Curriculum you would like to recommend? |  | | |

**ASSESSMENT AND EVALUATION ***

|  | Not Important | Moderately Important | Essential  /Very Important |
| --- | --- | --- | --- |
| **Programmatic assessment vs Summative vs formative assessment** |  |  |  |
| **Providing feedback (reinforcing and corrective)** |  |  |  |
| Reﬂection and reﬂective writing |  |  |  |
| Students’ role in Program evaluation |  |  |  |
| Assessment of components of Knowledge (SAQ, MCQ), |  |  |  |
| Assessment of components of Skill (OSCE, OSPE) |  |  |  |
| Assessment of components of Attitude (portfolio, work-based assessment, skill based assessment |  |  |  |
|  |  |  |  |
| Any other topics of assessment you would like to recommend? |  | | |

# 5. **LEADERSHIP AND PROFESSIONALISM ***

|  | Not Important | Moderately Important | Essential  /Very Important |
| --- | --- | --- | --- |
| Interpersonal skills and communication skills to keep students engaged |  |  |  |
| Medical Ethics |  |  |  |
| Leadership and leading clinical teams |  |  |  |
| Professionalism as medical educator |  |  |  |
| Patient safety and quality of care |  |  |  |
| Mentoring |  |  |  |
| Critical thinking and problem solving |  |  |  |
| Resilience and Grit |  |  |  |
| Stress management |  |  |  |
| Academic research, standard and scholarship |  |  |  |
| Any other topics of leadership and professionalism you would like to recommend? |  | | |

**Appendix C**

**Table: Percentage Response of Experts in Delphi Rounds 1 & 2**

| **Learning content** | **Percentage responses on importance** | | | **Decision** |
| --- | --- | --- | --- | --- |
| Very  Important  (3)  % | Mod  Imp  (2)  % | Not imp  (1)  % |  |
| **Principles of Adult learning** | 75(71*) | 16(20*) | 19(9*) | Removed |
| **Motivation in learning / Maslow’s Hierarchy** | 61(58*) | 34(31*) | 6(11*) | Removed |
| **Identify & incorporate experiential learning theory (Kolb’s)** | 57(56*) | 34(31*) | 10(11*) | Removed |
| **Weiner’s Attribution theory** | 22(36*) | 49(53*) | 15(25*) | Removed |
| **Self-directed learning theory & planning** | 80(70*) | 15(20*) | 5(10*) | Consensus developed in Round 2 |
| **Metacognitive strategies, critical thinking, and problem-solving.** | 79(75*) | 20(22*) | 1(3*) | Removed |
| **Learning styles (VARK, superficial and deep learners)** | 77(73*) | 18(22*) | 5(5*) | Removed |
| **Long-term, intermediate, and short-term memory** | 59 | 34 | 7 | New topic, Removed |
| **Student-centered vs. teacher-centered teaching skills** | 61(61*) | 34(30*) | 5(9*) | Removed |
| **Large group interactive sessions vs. small group sessions** | 57(48*) | 36(39*) | 7(13*) | Removed |
| **Small group learning and facilitation skills** |  |  |  | Removed |
| - **PBL** | 66(58*) | 26(37*) | 8(8*) | Removed |
| - **TBL** | (61*)55 | 33(37*) | 7(8*) | Removed |
| - **Tutorial** | 33(38*) | 52(42*) | 15(20*) | Removed |
| - **Simulation teaching** | **80(76*)** | 15(16*) | 5(8*) | Consensus developed in Round 2 |
| **Community-based teaching** | 75(67*) | 18(27*) | 7(6*) | Removed |
| **Evidence-based teaching** | 69(64*) | 23(27*) | 8(9*) | Removed |
| **Peer-assisted learning** | 71(67*) | 26(28*) | 3.2(5*) | Removed |
| **Online learning** | 57(55*) | 33(34*) | 10(11*) | Removed |
| **Collaborative learning** | 72(72*) | 26(23*) | 2(5*) | Removed |
| **Learning Environment** | 77(66*) | 18(30*) | 5(4*) | Removed |
| **Working with difficult learners** | 48(47*) | 41(41*) | 11(12*) | Removed |
| **CURRICULUM** |  |  |  | Removed |
| **Basics of curriculum and its various types, including Outcome/competency-based approach** | 56(41*) | 31(36*) | 13(23*) | Removed |
| **Hidden curriculum** | 18 | 59 | **22** | Removed |
| **Introduction to SMART objectives of knowledge, skill, and attitude** | 79(66*) | 15(22*) | 7(12*) | Removed |
| **Spiral curriculum** | 51 | 31 | 18 | Removed |
| **Assessment of components of Knowledge (SAQ, MCQ),** | 64(48*) | 26(39*) | 10(13*) | Removed |
| **Programmatic assessment vs**  **Summative vs. formative assessment** | 61(56*) | 26(34*) | 13(10*) | Removed |
| **Providing feedback (reinforcing and corrective)** | **80(56*)** | 18(31*) | 2(13*) | Consensus developed in Round 2 |
| **Reflection and reflective writing** | **85(59*)** | 13(28*) | 2(13*) | Consensus developed in Round 2 |
| **Students' role in Program Evaluation** | 59(670* | 33(22*) | 9(11*) | Removed |
| **Study guide, TOS, and blueprinting** | 59 | 28 | 13 | Removed |
| **Online assessment** | 39 | 43 | 18 | Removed |
| **Mentoring** | 69(64*) | 28(28*) | 3(8*) | Removed |
| **Resilience and Grit** | 59(61*) | 33(32*) | 8(6*) | Removed |

**** "Figures in bracket represent the percentage response of Round I."***

**Appendix D**

**Table: Stability Testing of Learning Content Where Consensus has been developed**

|  |  | Round 1 Agreement  % | Round 2 agreement | Mc Neymar’s applied for stability | Decision-based on predefined criteria  CD: consensus developed |
| --- | --- | --- | --- | --- | --- |
| **EDUCATIONAL PSYCHOLOGY** | | | | | |
| **1** | **Self-directed learning:**  **theory and planning** | 69 | 81 | 0.17 | CD Round 2  Stability achieved |
| **TEACHING AND LEARNING** | | | | | |
| 2 | **Bedside teaching** | 80 | 87 | 1 | CD round 1  SA |
| 3 | **Procedural skill teaching** | 84 | 81 | 0.82 | CD Round 1  Stability achieved |
| 4 | **Simulation learning** | 76 | 80 | 0.68 | CD Round 2  Stability achieved |
| **5** | **Skills for delivering effective presentations (Gagne’s)** | 75 | 81 | 0.68 | CD Round 1  Stability achieved |
| **ASSESSMENT** | | | | | |
| **6** | **Assessment of Skill (OSCE and OSPE, checklist and rating scale)** | 88 | 88 | 1 | CD Round 1  Stability achieved |
| **7** | **Assessment of Attitude (portfolio, work-based assessment, skill-based assessment)** | 86 | 86 | 1 | CD Round 1  Stability achieved |
| **8** | **Providing Feedback** | 79 | 80 | 1 | CD Round 2  Stability achieved |
| **9** | **Reflection and Reflective writing** | 79 | 85 | 0.23 | CD Round 2  Stability achieved |
| **LEADERSHIP AND PROFESSIONALISM** | | | | | |
| **10** | **Interpersonal skills and communication skills to keep students engaged** | 87 | 89 | 1 | CD Round 1  Stability achieved |
| **11** | **Medical Ethics** | 82 | 80 | 0.25 | CD Round 1  Stability achieved |
| **12** | **Leadership and leading clinical teams** | 81 | 85 | 0.63 | CD Round 1  Stability achieved |
| **13** | **Professionalism as a medical educator** | 81 | 82 | 1 | CD Round 1  Stability achieved |
| **14** | **Patient safety and quality of care** | 82 | 80 | 1 | CD Round 1  Stability achieved |
| **15** | **Critical thinking and problem solving** | 87 | 90 | 0.55 | CD Round 1  Stability achieved |
| **16** | **Stress Management** | 89 | 87 | 1 | CD Round 1  Stability achieved |
| **17** | **Academic research, standards, and scholarship** | 84 | 82 | 1 | CD Round 1  Stability achieved |
